# Supplementary material for: Improved performances toward electrochemical carbon dioxide and oxygen reductions by iron-doped stannum nanoparticles
Source: Royal Society of Chemistry journal article supplement (doi:10.1039/d4nr04843a), 2025-01-01
Supplement: d4nr04843a1.pdf [file d4nr04843a1.pdf]

## Improved performances toward electrochemical carbon dioxide and oxygen reductions by iron-doped stannum nanoparticles

*Jiangtao Zhu<sup>a,b†</sup>, Quan Zhang<sup>a†</sup>, Caiyun Wang<sup>b\*</sup>, Yanhong Feng<sup>a</sup>, Yuanyuan Zhang<sup>c</sup>,  
Gaocan Qi<sup>d\*</sup>, Lian Kang<sup>a</sup>, Jun Luo<sup>e</sup>, and Xijun Liu<sup>c\*</sup>*

- a) MOE Key Laboratory of New Processing Technology for Nonferrous Metals and Materials, School of Resources, Environment and Materials, Guangxi University, Nanning 530004, China.
- b) Guangxi Vocational & Technical Institute of Industry, Nanning 530001, China.
- c) Key Laboratory of High-precision Computation and Application of Quantum Field Theory of Hebei Province, Hebei Key Lab of Optic-electronic Information and Materials, The College of Physics Science and Technology, Hebei University, Baoding, 071002, China.
- d) School of Materials Science and Engineering, Tianjin University of Technology, Tianjin 300384, China.
- e) ShenSi Lab, Shenzhen Institute for Advanced Study, University of Electronic Science and Technology of China, Longhua District, Shenzhen 518110, China.

† These authors contributed equally to this work.

**Authors to whom correspondence should be addressed:** wangcaiyun@gxgy.edu.cn;  
gaocanqi@tjut.edu.cn; xjliu@gxu.edu.cn.

## **Experimental Section**

### **Chemicals and materials**

$\text{Fe}(\text{NO}_3)_3 \cdot 9\text{H}_2\text{O}$  (anhydrous, 99%), Zinc acetate (97.5%), 2-Methylimidazole and (98.5%),  $\text{SnCl}_2$  (anhydrous, 99%) are purchased from Sinopharm Chemical Reagent Co., Ltd. Methanol (99.5%) and Ethanol (99.7%) are purchased from Sinopharm Chemical Reagent Co., Ltd.

### **Synthesis of Fe-Sn/NC:**

The precise procedure is as follows: By using ultrasound, 900 mg of Zinc acetate and 22 mg Tin chloride have been dispersed in 10 mL of deionized water (A liquor). It took 10 mL of distilled water to completely disintegrate 2.75g of 2-methylimidazole (B liquor). A and B were mixed evenly and ultra sounded for 30 min. 15 mg Ferric nitrate are added into this liquor and agitated for 6 h at room temperature. The suspension is centrifuged to obtain a solid powder. After drying in a vacuum drying oven at 70°C for 12 h, the light-yellow brown powder obtained was named Fe-Sn/ZIF-8. Sn nanoparticles with Fe doped N-carbon framework named Fe-Sn/NC were obtained by calcining the precursor in 900°C  $\text{H}_2/\text{Ar}$  atmosphere for 2 h.

### **Synthesis of Sn/NC**

Ferric nitrate is not added in the synthesis process. Other steps are the same as the synthesis of Fe-Sn/NC.

### **Synthesis of NC**

Ferric nitrate and tin chloride are not added in the synthesis process. Other steps are the same as the synthesis of Fe-Sn/NC.

## **Characterization**

The morphology and microstructure of the samples were characterized by field emission scanning electron microscopy (FESEM, Verios 460L). Transmission electron microscope (TEM), High angle annular dark field Scanning-Transmission Electron Microscopy (HAADF-STEM) images, and Energy Dispersive X-ray spectroscopy (EDX) mappings of the samples were characterized by using an FEI Talos F200X S with a field-emission gun at 200 kV. X-ray diffractometer (XRD) patterns were obtained by an X-ray diffractometer (Rigaku SmartLab) from 10 to 90 degrees at a scan rate of 20 min<sup>-1</sup> with Cu K $\alpha$  radiation ( $\lambda$  = 0.154598 nm). X-ray Photoelectron Spectroscopy (XPS) spectra were collected by a Thermo Scientific K-alpha XPS system (Thermo Fisher Scientific, UK) with the Al K $\alpha$  radiation as the X-ray source. Inductively coupled plasma source mass spectrometer (ICP-MS, iCAP RQ, Germany). The liquid and gas products were characterized by Avance III HD 400MHz NMR and gas chromatography (Agilent GC-7890B).

## **Electrochemical measurements**

The electrochemical CO<sub>2</sub>RR test was carried out in an H-type reactor separated by a Nafion 115 membrane. The electrolyte was 0.5 M KHCO<sub>3</sub> solution in compartments. Ag/AgCl electrode and Pt foil (1×1 cm<sup>2</sup>) were used as the reference and counter electrodes, respectively. Fe-Sn/NC, Sn/NC, and NC coated on hydrophobic carbon

paper ( $1 \times 1 \text{ cm}^2$ ) for working electrode., respectively. Firstly, 6 mg of catalyst is dispersed into 60  $\mu\text{L}$  of 5 wt% Nafion solution in 0.54 mL of ethanol to prepare the catalyst ink dispersing over a period of 15-20 minute. Next, 100  $\mu\text{L}$  of the catalyst ink is dropped onto carbon paper and dried it, maintaining the catalyst loading on the carbon to relative to the RHE electrode according to the following formula:  $E_{\text{RHE}} = E_{\text{Ag/AgCl}} + 0.0591 \text{ pH} + 0.197$ .

The aqueous Zn-CO<sub>2</sub> electrochemical was performed in H-cell, which assembles with Sn/Fe-NC ( $1 \times 1 \text{ cm}^2$ ) in catholyte (CO<sub>2</sub>-saturated 0.5 M KHCO<sub>3</sub>) as the cathode and  $2 \times 5 \text{ cm}^2$  Zn plate immersing in anolyte (6 M KOH + 0.2 M Zn(CH<sub>3</sub>COO)<sub>2</sub>) as the anode. The amphoteric electrolyte was separated by a bipolar membrane, which composites negative and positive membrane and causes H<sub>2</sub>O dissociating into H<sup>+</sup> and OH<sup>-</sup> under the direct current electric field. During the discharging process, 30 mL min<sup>-1</sup> CO<sub>2</sub> continuously aerates into the catholyte causing CO product evolution ( $\text{CO}_2 + 2\text{H}^+ + 2\text{e}^- \rightarrow \text{H}_2\text{O} + \text{CO}$ ) and Zn plate dissolution ( $\text{Zn} + 4\text{OH}^- \rightarrow \text{Zn(OH)}_2 + 4\text{e}^-$ ). Regarding cathodic reaction, CO<sub>2</sub> reduction capably occurs in near-neutral electrolytes, which prevent acidic CO<sub>2</sub> from reacting with an alkaline electrolyte. For anodic Zn/Zn(OH)<sub>2</sub>, the near-neutral electrolyte is insufficient to driven Zn dissolution. Therefore, alkaline KOH and near-neutral KHCO<sub>3</sub> are adopted to actuate Zn/Zn(OH)<sub>2</sub> and CO<sub>2</sub>RR, respectively. The possible charge-discharge reactions of an aqueous Zn-CO<sub>2</sub> battery are assumed as below:

Cathode (0.5 M KHCO<sub>3</sub> sat. CO<sub>2</sub>)

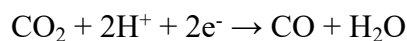

Anode (6 M KOH with 0.2 M  $\text{Zn}(\text{CH}_3\text{COO})_2$ )

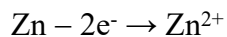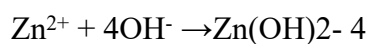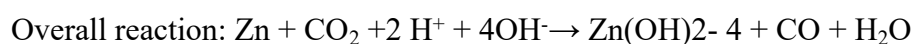

During the charging process, the half-reactions on the electrode can be described as:

Cathode (0.5 M  $\text{KHCO}_3$  sat.  $\text{CO}_2$ )

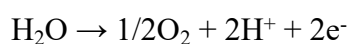

Anode (6 M KOH with 0.2 M  $\text{Zn}(\text{CH}_3\text{COO})_2$ )

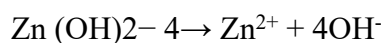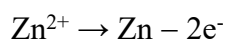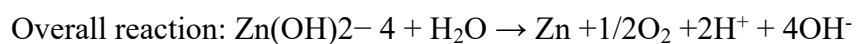

### **Products analysis.**

Gas chromatography (GC, Agilent GC-7890B) equipped with thermal conductivity detector (TCD) and  $^1\text{H}$  nuclear magnetic resonance ( $^1\text{H}$  NMR, AVANCE AV III 400 Bruker) were used to analyze gas and liquid products, respectively. There are no significant peak signals of the liquid products display in the  $^1\text{H}$  NMR spectrum. Before gas products feeding to GC, all the outlet  $\text{CO}_2$  flow rate was collected by an air pocket, which avoids extra water vapor causing the chromatographic column damage. The flow

rate feeding to air pocket is equal to inlet CO<sub>2</sub> flow rate (i.e., the total volume of outlet gas product equals to inlet CO<sub>2</sub> volume). Subsequently, the collected gas product was fed to GC by the air pocket for detected the average fraction of CO/H<sub>2</sub>.

The FE<sub>CO/H<sub>2</sub></sub> was described as below:

$$FE_{CO/H_2} (\%) = (2 \times m \times F)/Q = (2C_{gas} \times V_{CO_2} \times 10^{-3} \times t \times F)/24.8Q$$

where m is the mol amount of CO generated; F is the Faraday constant (96485 C mol<sup>-1</sup>); *Q* is the total quantity of electric charge during the electrolysis at a constant current density; *C<sub>gas</sub>* is the volume concentration of the gas-phase products, calculated based on the GC results; *V<sub>CO2</sub>* is the flow rate of CO<sub>2</sub> (30 ml min<sup>-1</sup>); t is electrolysis time.

## Figures and Table

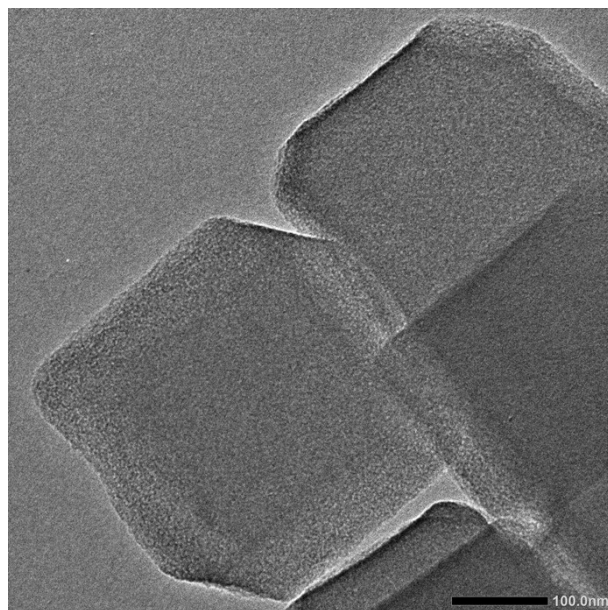

**Fig. S1** SEM images of NC.

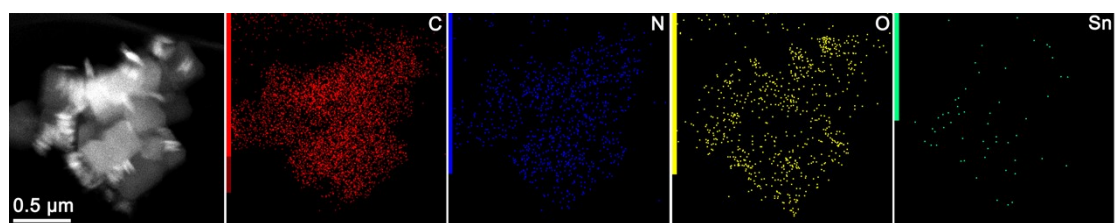

**Fig. S2** EDS mapping of Sn/NC catalyst.

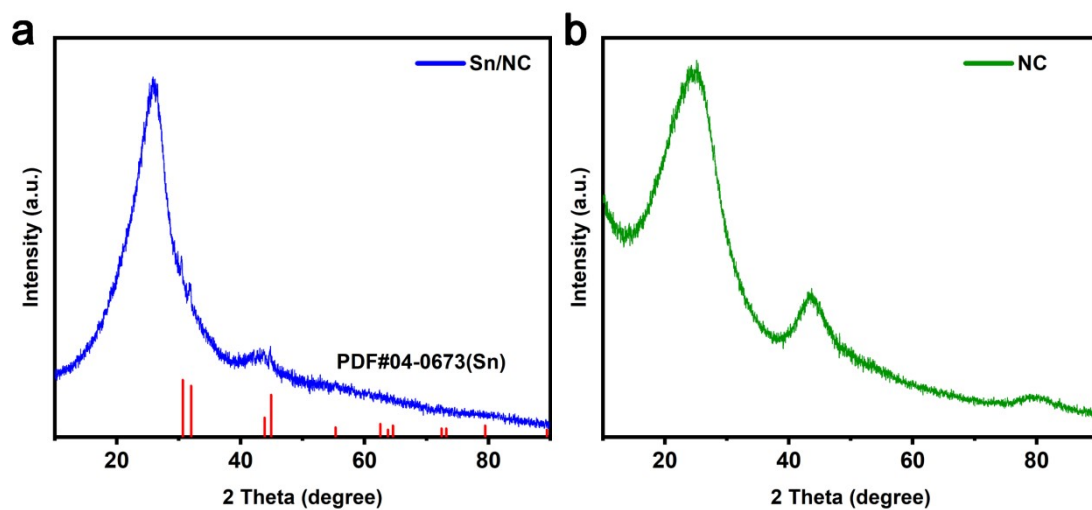

**Fig. S3** The XRD patterns of NC and Sn/NC.

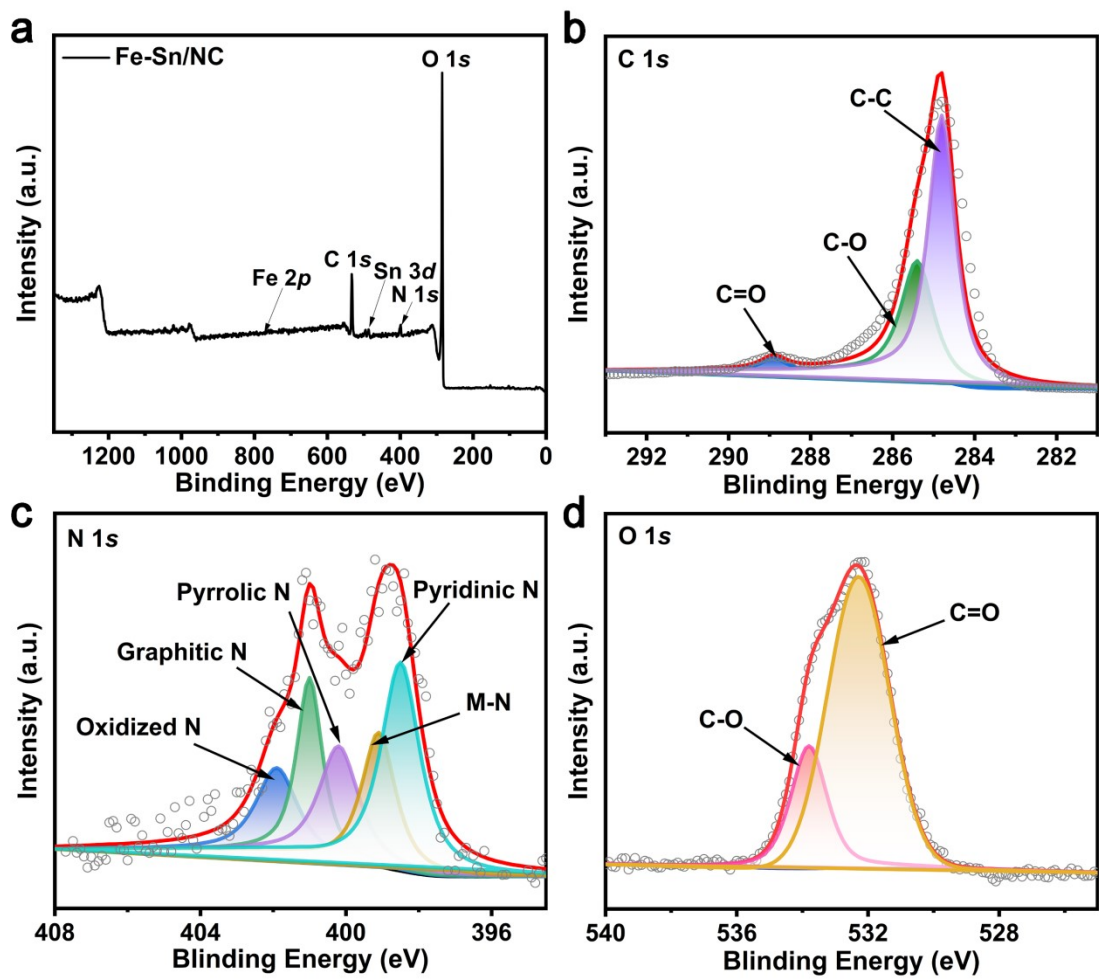

**Fig. S4** XPS spectra of the full spectrum, C 1s, N 1s and O 1s.

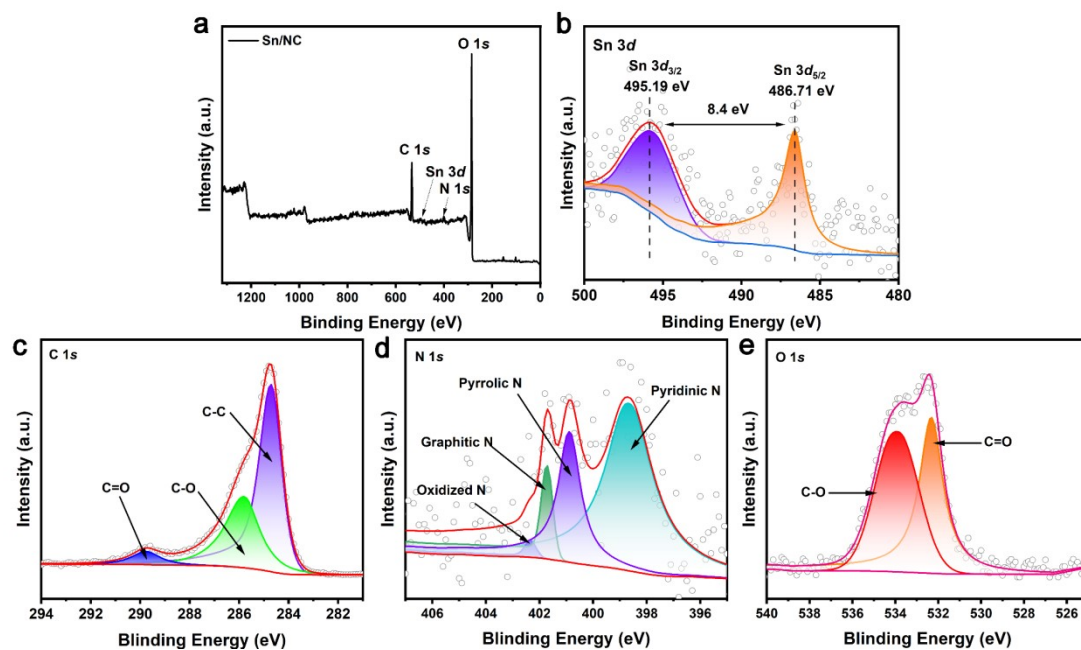

**Fig. S5** XPS spectra of the full spectrum, Sn 3d, C 1s, N 1s and O 1s.

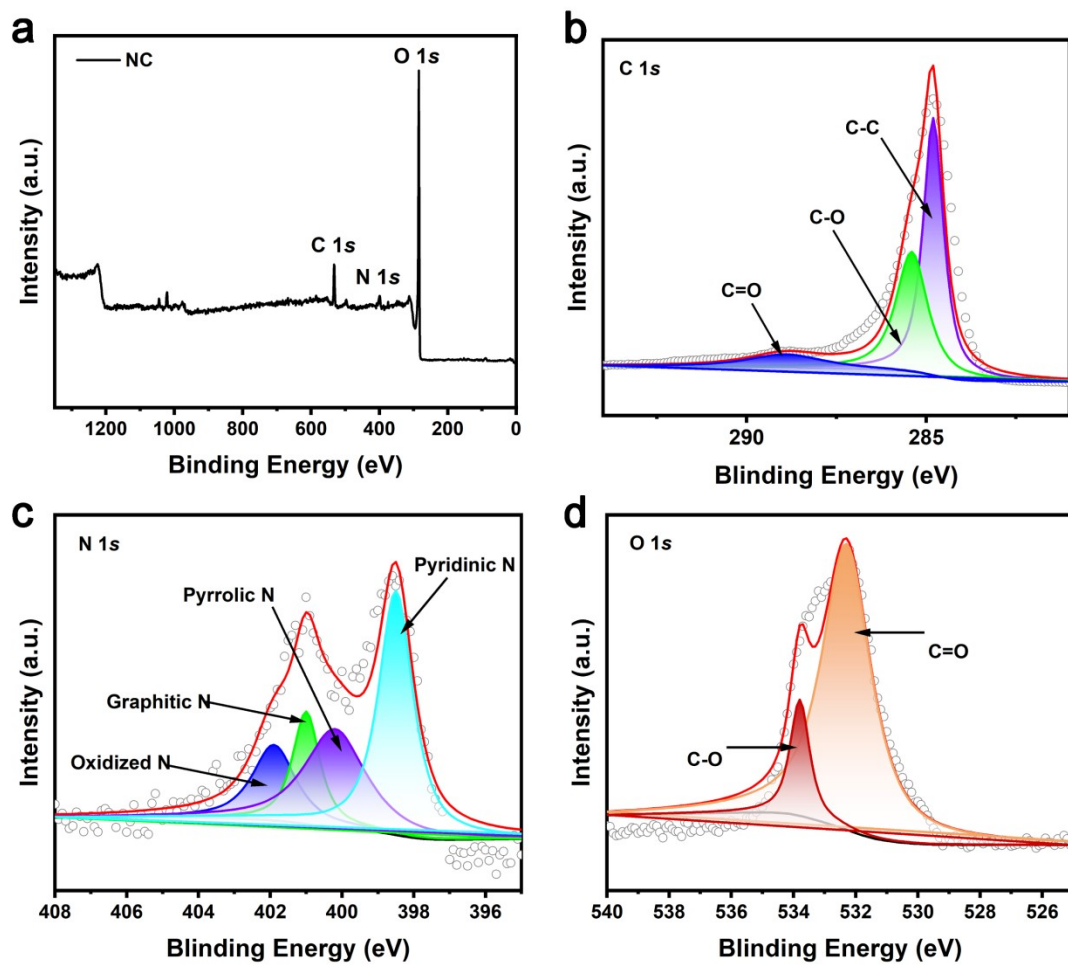

**Fig. S6** XPS spectra of the full spectrum, C 1s, N 1s and O 1s.

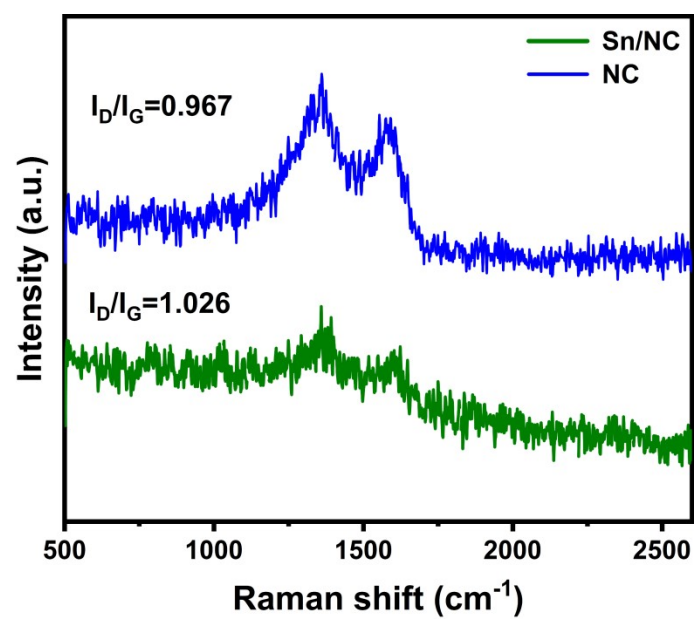

**Fig. S7** Raman spectrum of Sn/NC and NC.

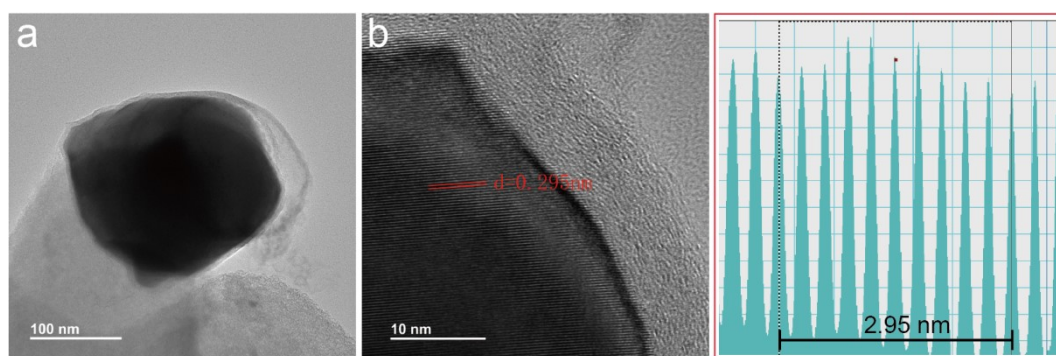

**Fig. S8** (a) TEM images of Fe-Sn/NC catalyst; (b) High-resolution TEM images of Fe-Sn/NC catalyst.

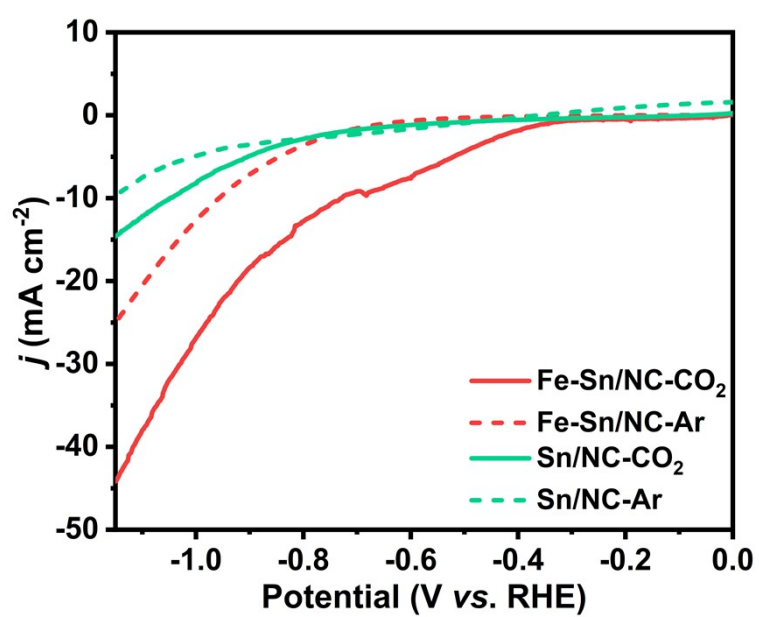

**Fig. S9** LSV of Fe-Sn/NC and Sn/NC in CO<sub>2</sub> or Ar saturated 0.5 M KHCO<sub>3</sub>.

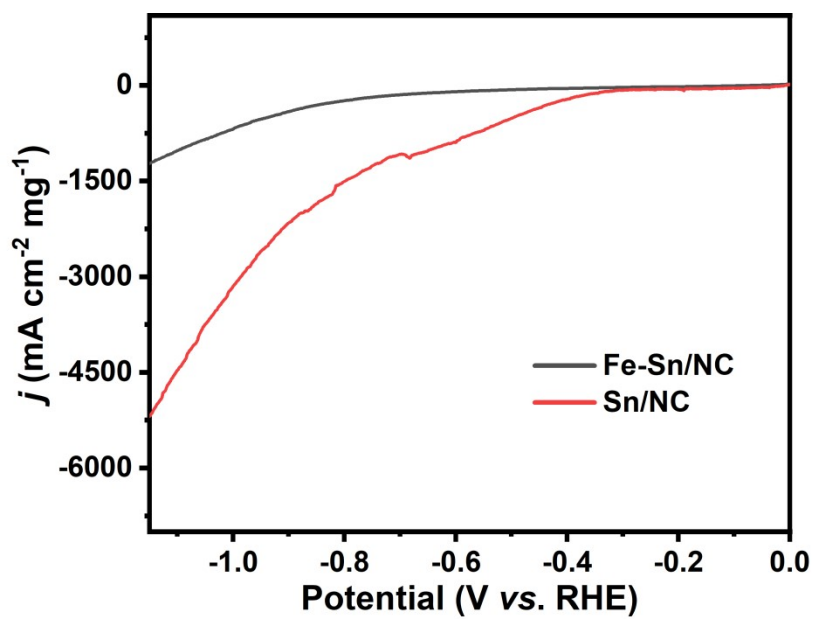

**Fig. S10** LSV curve normalized by Sn mass.

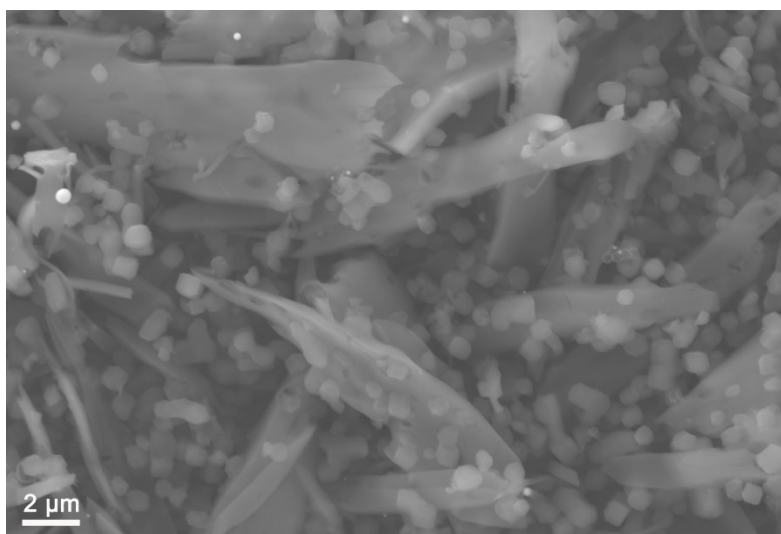

**Fig. S11** SEM of Fe-Sn/NC after the stability of CO<sub>2</sub>RR.

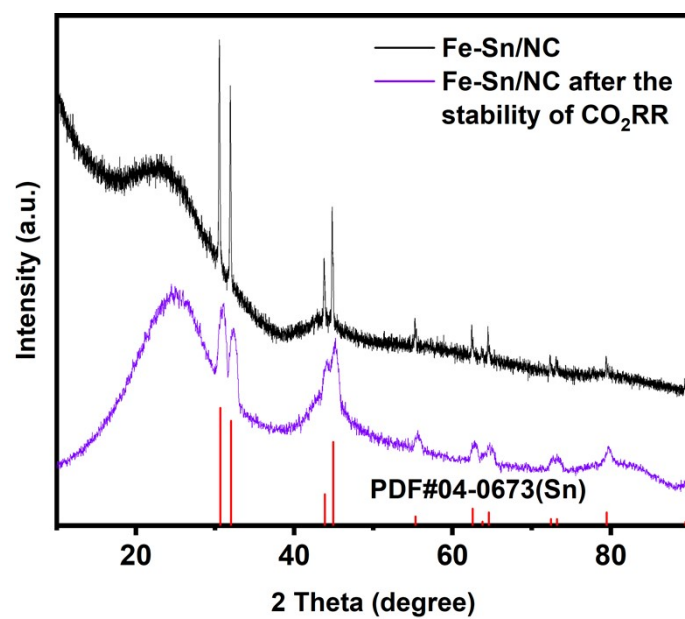

**Fig. S12** The XRD patterns of Fe-Sn/NC after the stability of CO<sub>2</sub>RR.

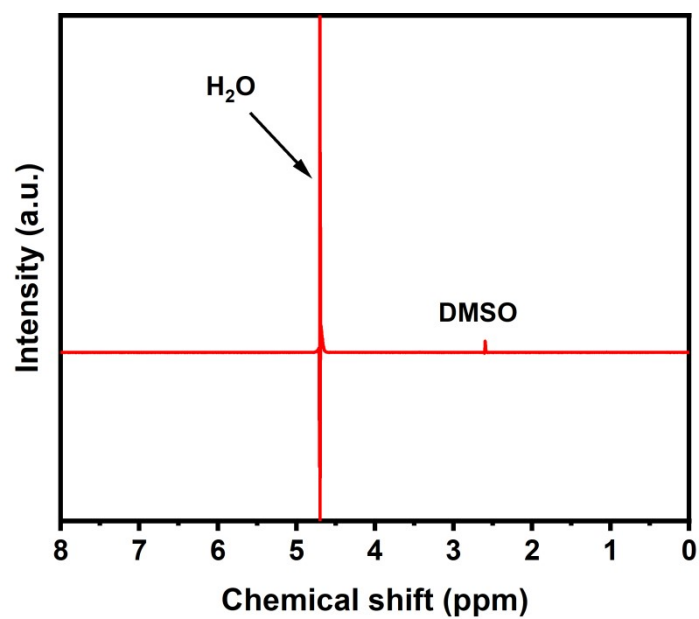

**Fig.S13**  $^1\text{H}$  NMR spectrum of the liquid product, collecting from the stability of  $\text{CO}_2\text{RR}$ , electrolyte solution was collected from the cathode chamber after electrolysis and characterized by Avance III HD 400MHz  $^1\text{H}$  nuclear magnetic resonance ( $^1\text{H}$  NMR) and no liquid reduction product can be detected.

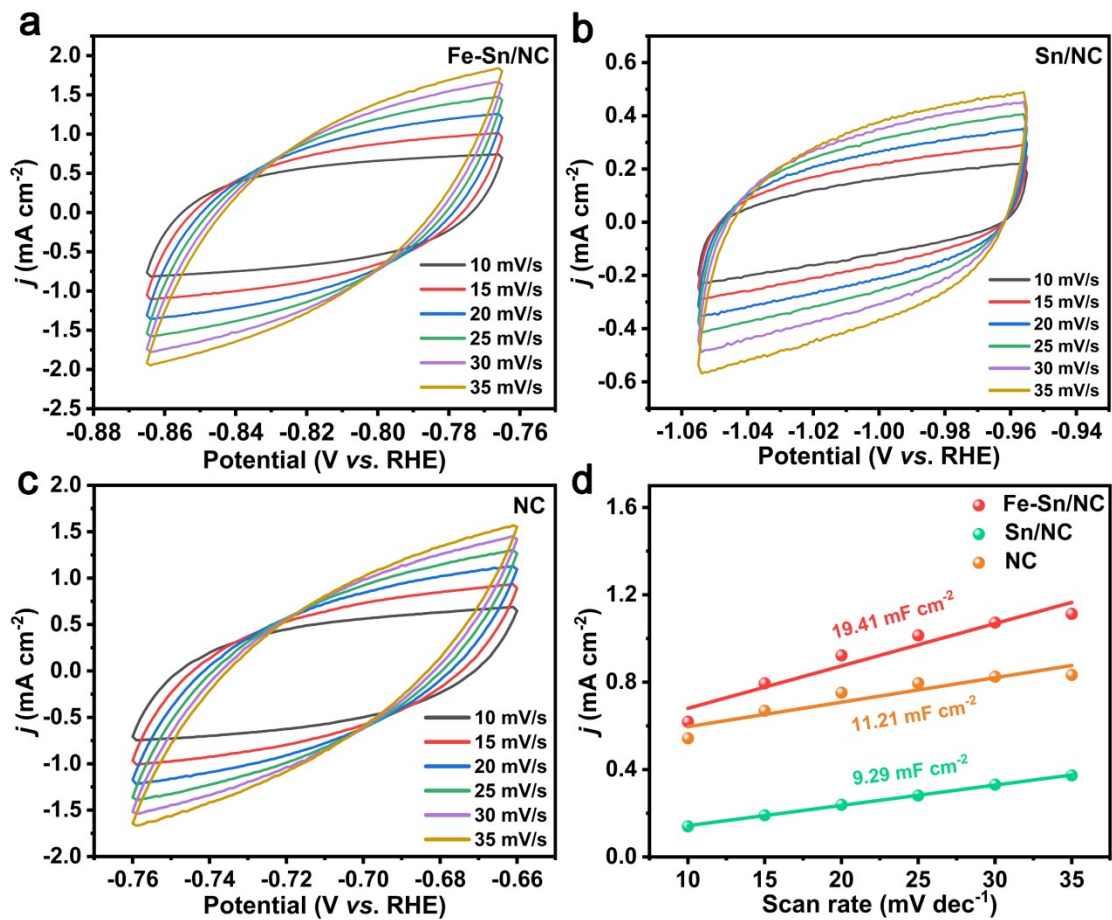

**Fig. S14** (a), (b) and (c) ECSA of Fe-Sn/NC, Sn/NC and NC in CO<sub>2</sub>RR; (d)  $C_{dl}$  of Fe-Sn/NC, Sn/NC and NC.

$$j_{ECSA} = j \cdot 40 \mu F / C_{dl}$$

From the above formula, the ECSA of the Fe-Sn/NC, Sn/NC, and NC<sup>1,2</sup>:

$$A_{ECSA} \text{ Fe-Sn/NC} = 19410 \mu F / 40 \mu F \text{ cm}^{-2} = 485.25 \text{ cm}^2$$

$$A_{ECSA} \text{ Sn/NC} = 11210 \mu F / 40 \mu F \text{ cm}^{-2} = 280.25 \text{ cm}^2$$

$$A_{ECSA} \text{ NC} = 9290 \mu F / 40 \mu F \text{ cm}^{-2} = 232.25 \text{ cm}^2$$

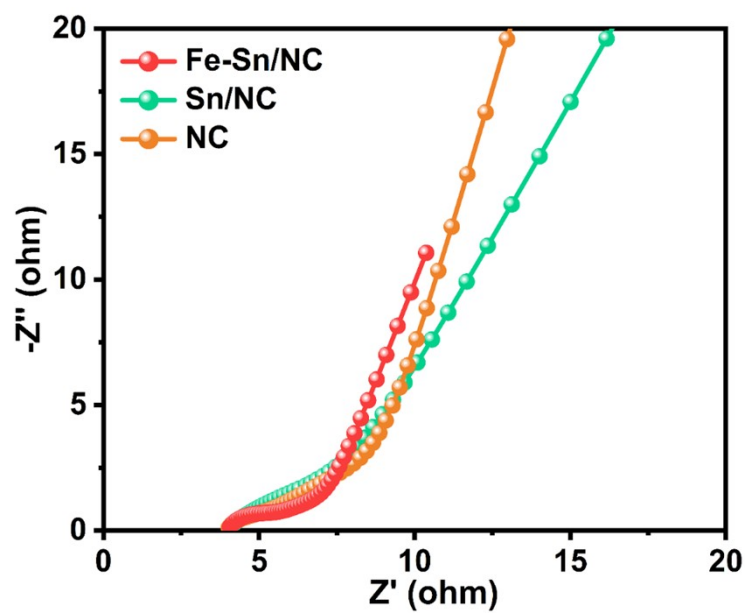

**Fig. S15** EIS of Fe-Sn/NC, Sn/NC and NC.

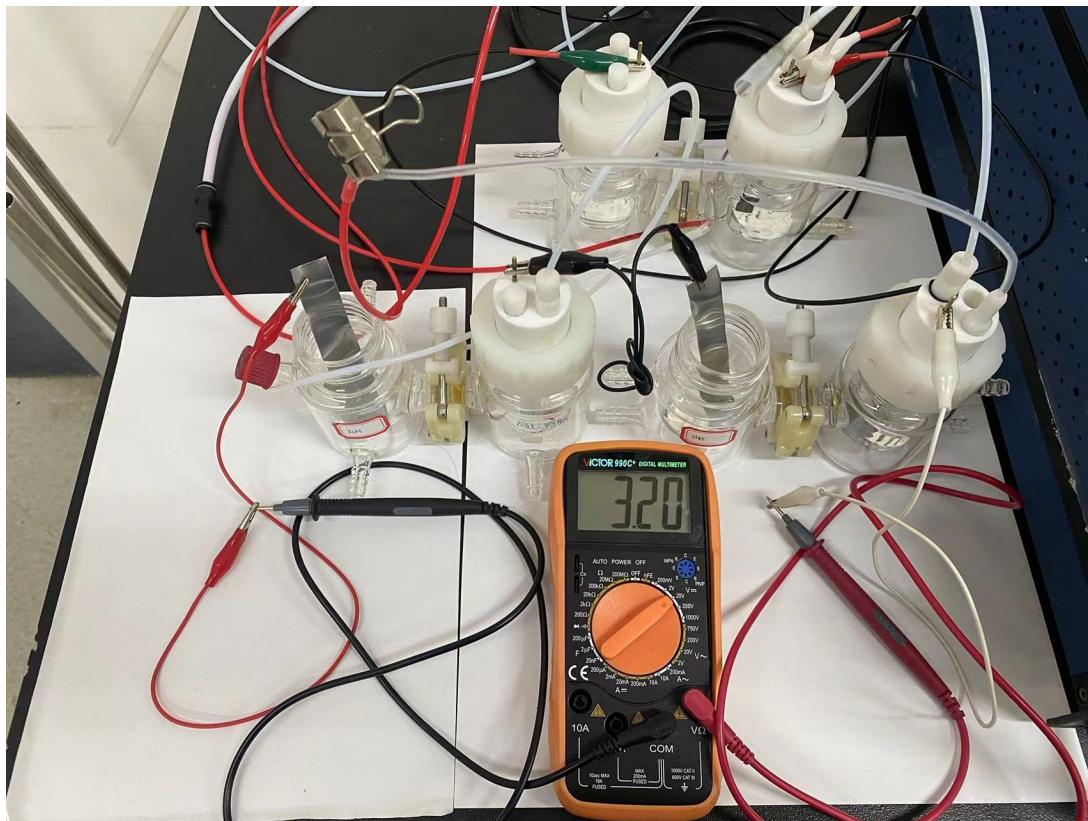

**Fig. S16** The schematic diagram of Zn-CO<sub>2</sub> battery driven CO<sub>2</sub>RR.

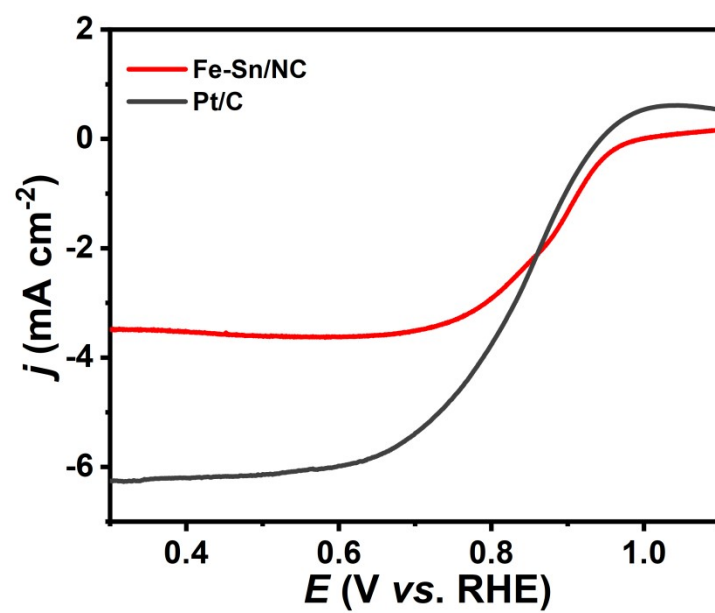

**Fig. S17** LSV of Fe-Sn/NC and Pt/C in ORR.

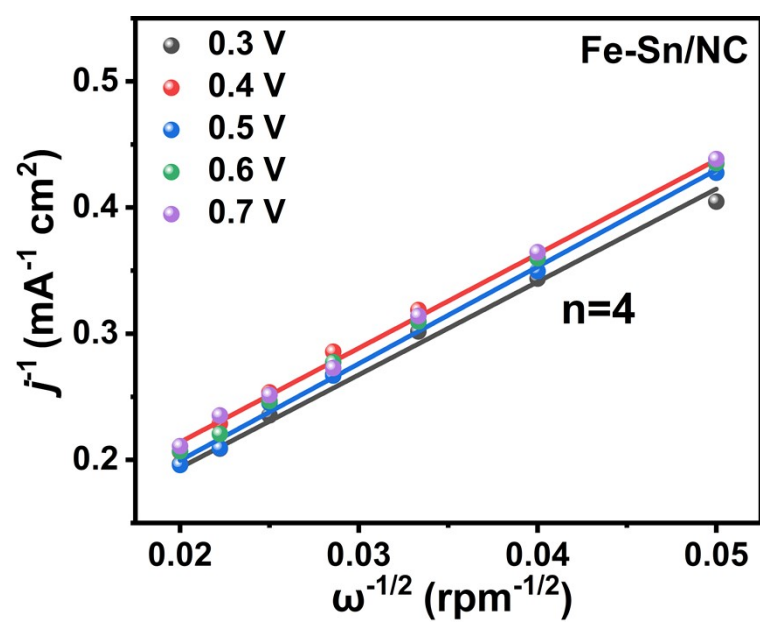

**Fig. S18** The K–L plots at different potentials.

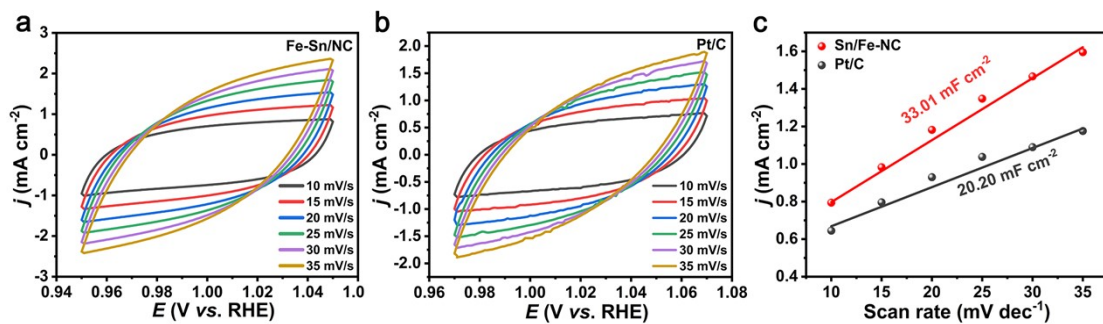

**Fig. S19** (a) and (b) ECSA of Fe-Sn/NC and Pt/C in ORR, (c)  $C_{dl}$  of Fe-Sn/NC and Pt/C.

$$j_{ECSA} = j \cdot 40 \mu F / C_{dl}$$

From the above formula, the ECSA of the Fe-Sn/NC and Pt/C:

$$A_{ECSA} \text{ Fe-Sn/NC} = 33010 \mu F / 40 \mu F \text{ cm}^{-2} = 825.25 \text{ cm}^2$$

$$A_{ECSA} \text{ Pt/C} = 20200 \mu F / 40 \mu F \text{ cm}^{-2} = 505 \text{ cm}^2$$

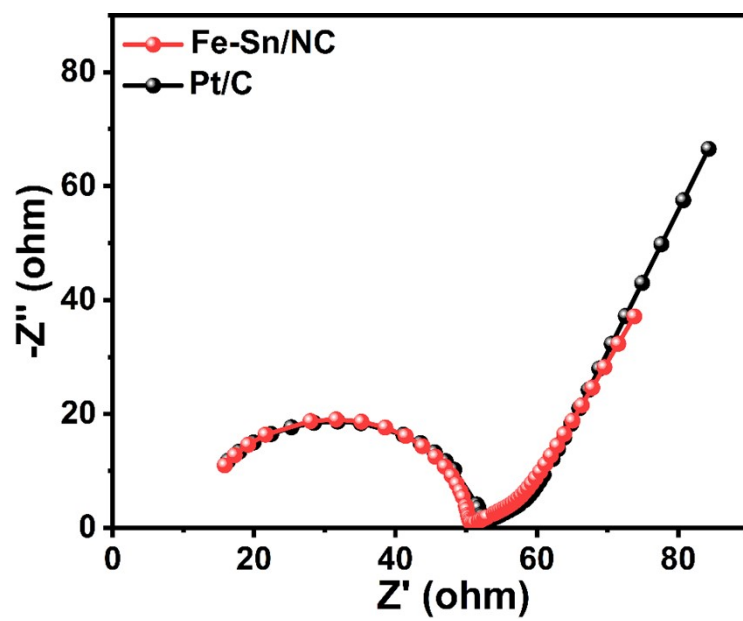

**Fig. S20** EIS of Fe-Sn/NC and Pt/C in ORR.

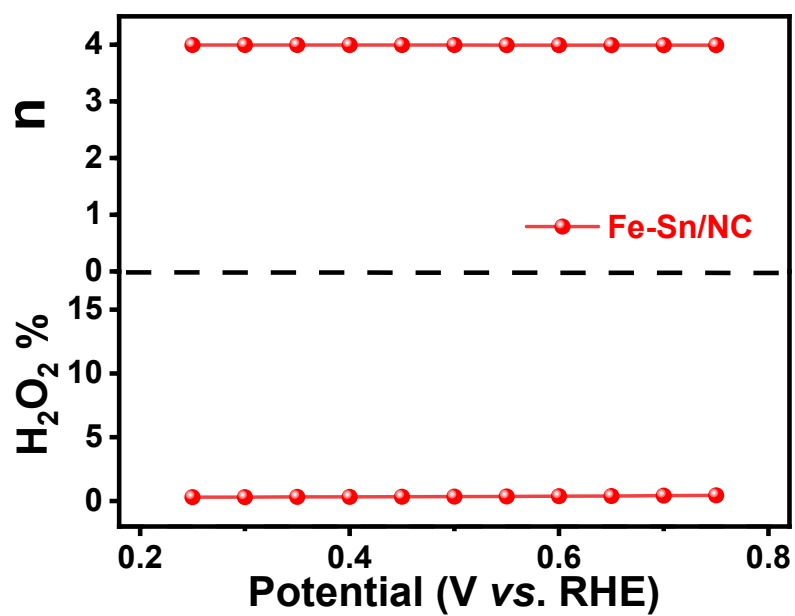

**Fig. S21** The  $H_2O_2$  yield rate and the electron transfer number  $n$  in  $O_2$ -saturated 0.1 M KOH.

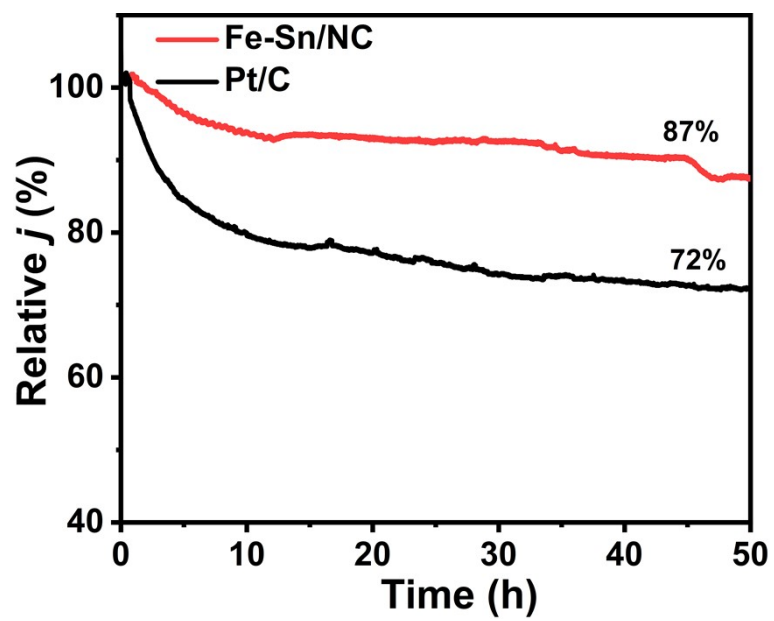

**Fig. S22** The stability of the constant voltage discharge test was tested at 0.6 V.

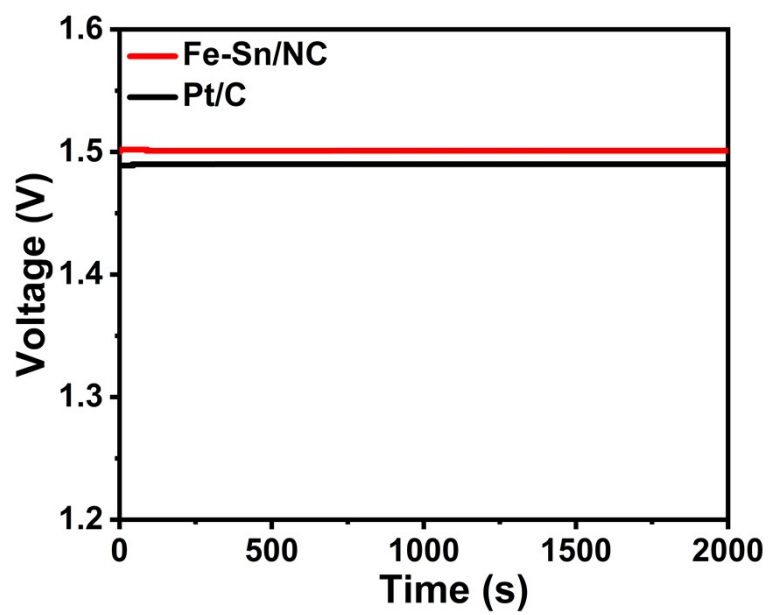

**Fig. S23** The open circuit voltage of ZAB.

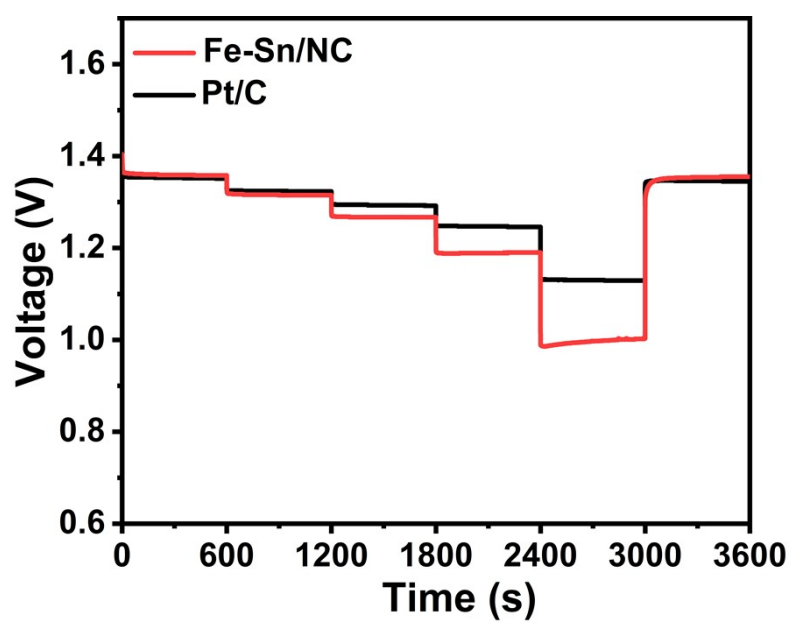

**Fig. S24** The discharge steps of the ZAB assembled with Fe-Sn/NC and Pt/C.

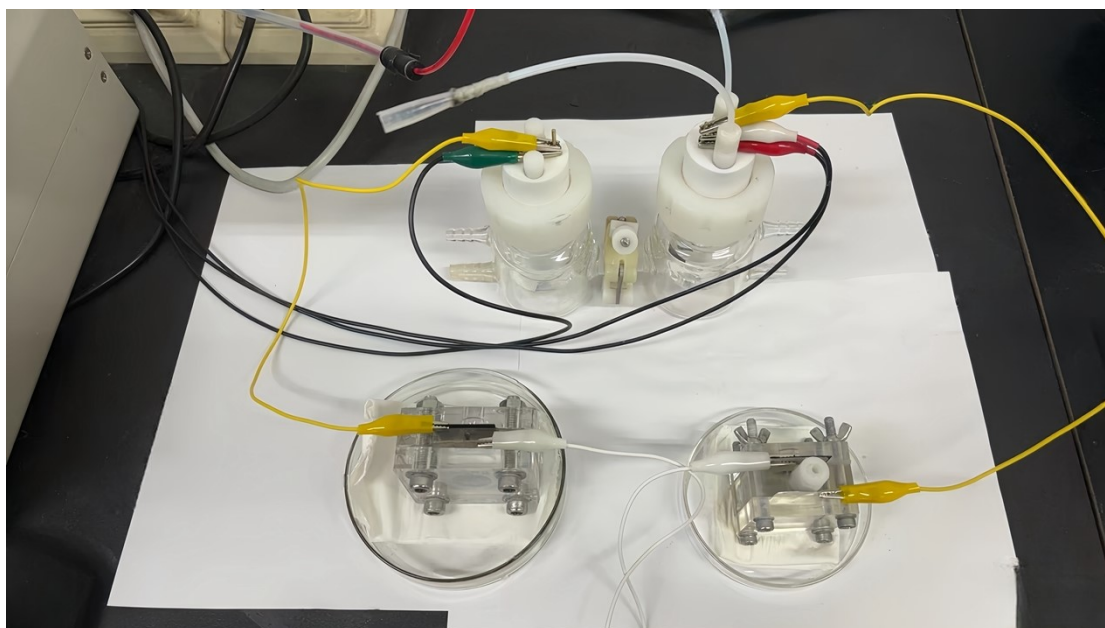

**Fig. S25** The schematic diagram of Zn–Air battery driven CO<sub>2</sub>RR.

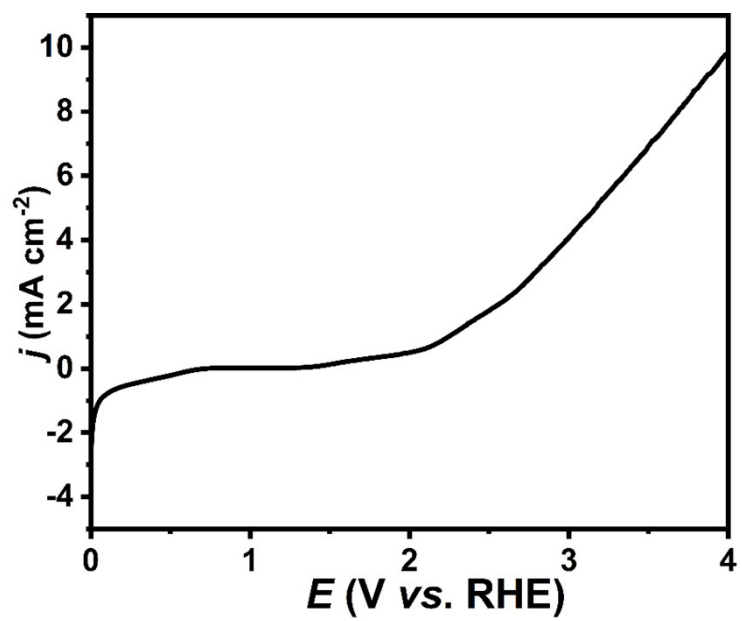

**Fig. S26** LSV of Fe-Sn/NC with Zn-CO<sub>2</sub> battery driven CO<sub>2</sub>RR.

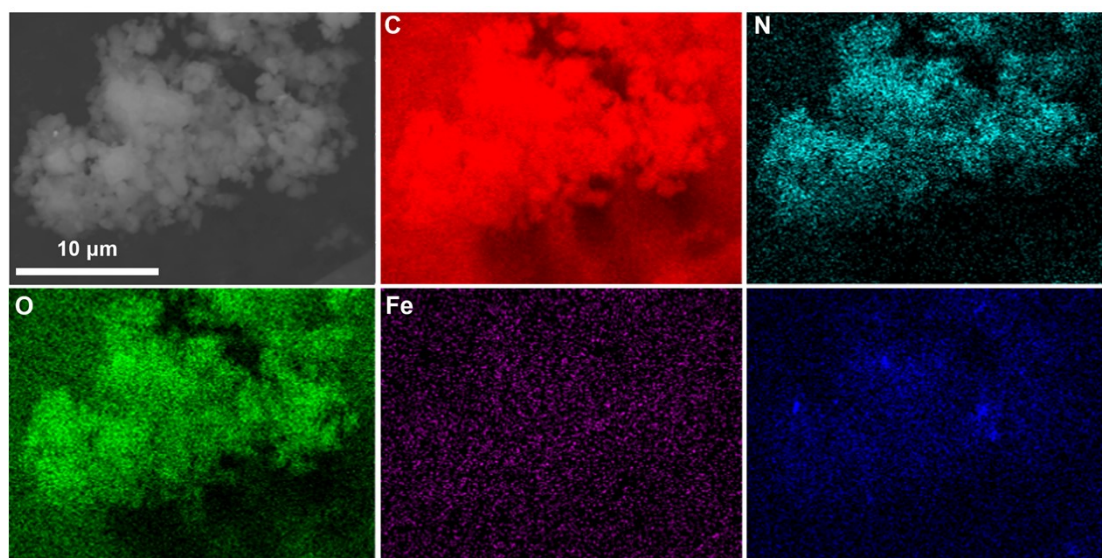

**Fig. S27** SEM image and the corresponding elemental mapping of Fe-Sn/NC-10-22.

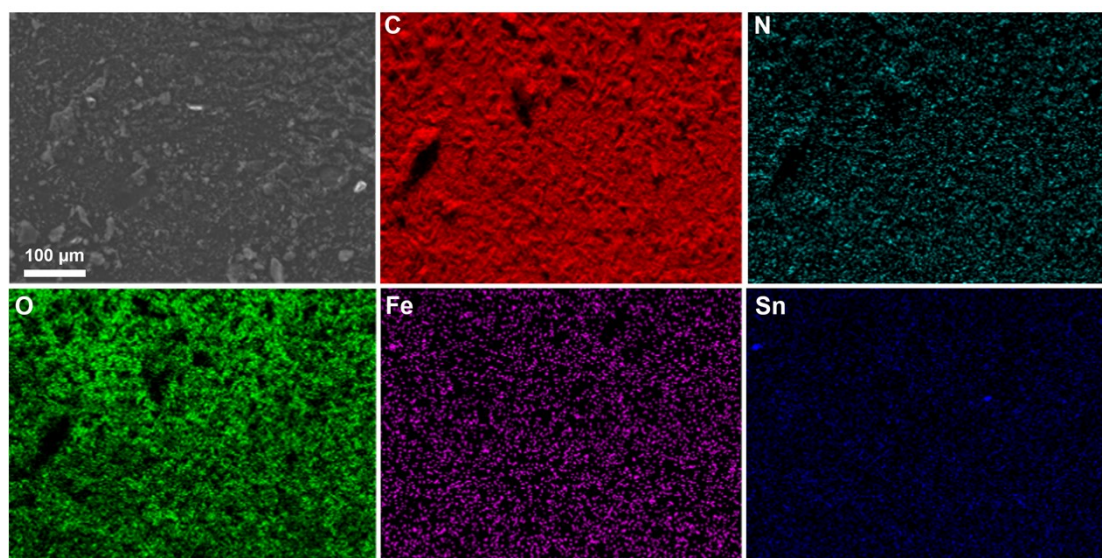

**Fig. S28** SEM image and the corresponding elemental mapping of Fe-Sn/NC-15-11.

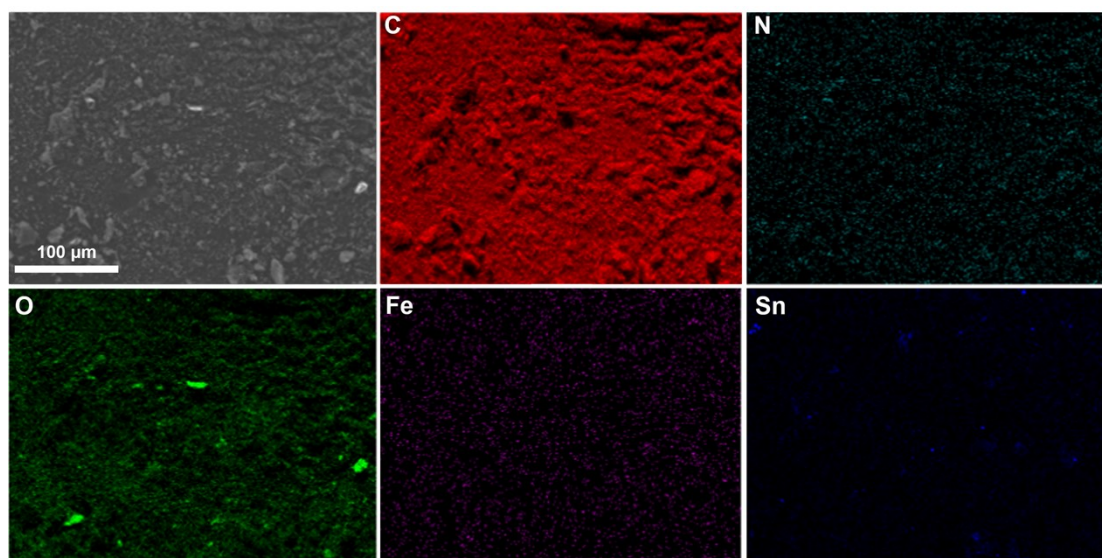

**Fig. S29** SEM image and the corresponding elemental mapping of Fe-Sn/NC-15-33.

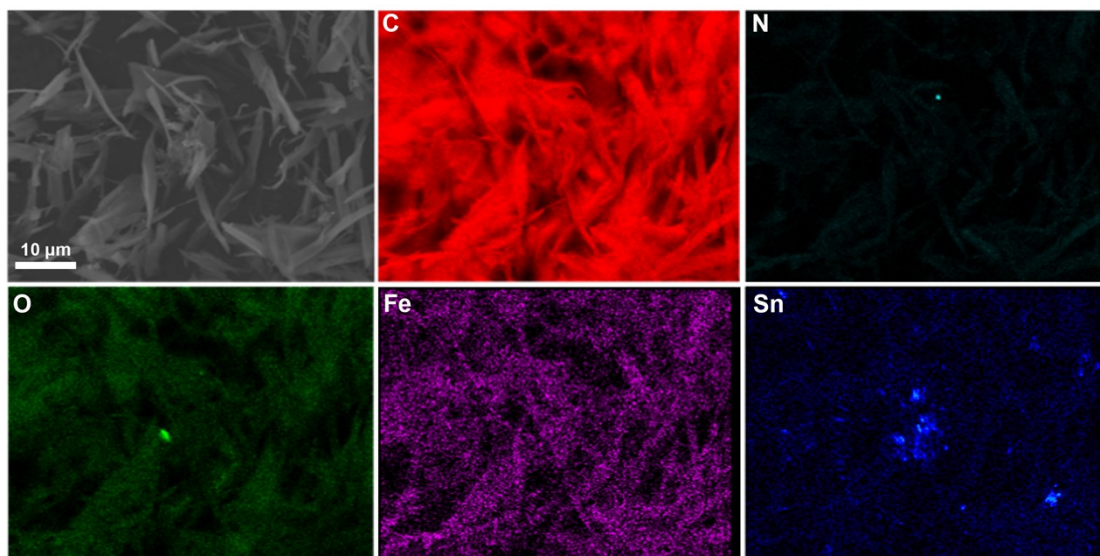

**Fig. S30** SEM image and the corresponding elemental mapping of Fe-Sn/NC-20-22.

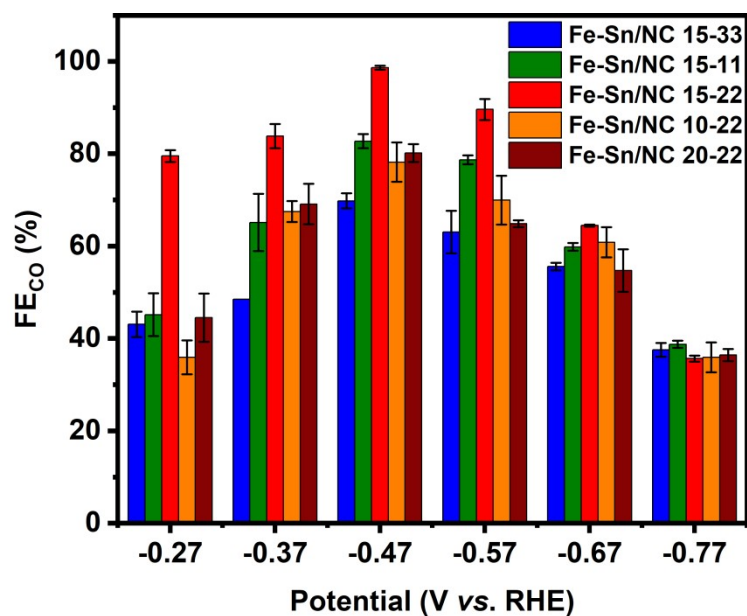

**Fig. S31** The  $FE_{CO}$  production at a specific potential for the samples with different ratios of Fe and Sn.

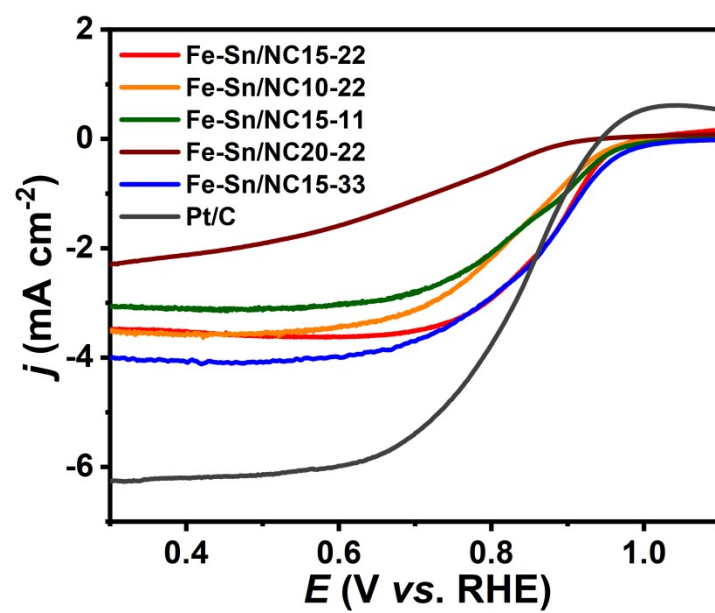

**Fig. S32** The LSV curves of samples with different ratios of Fe and Sn at different rotating speeds.

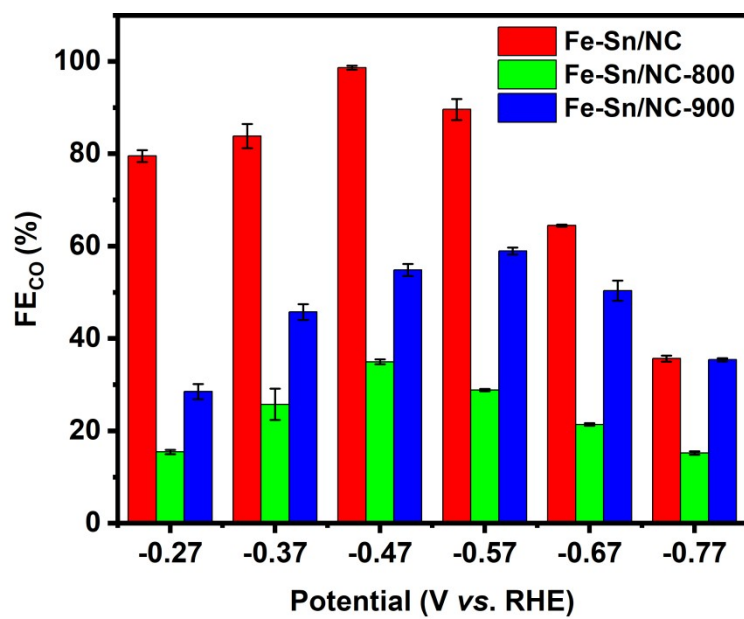

**Fig. S33** The FE<sub>CO</sub> generated at a specific potential for samples synthesized at different calcination temperatures.

**Table S1** Fe and Sn content of Fe-Sn/NC and Sn/NC identified by ICP-MS.

| Catalyst | Fe (wt.%) | Sn (wt.%) |
|----------|-----------|-----------|
| Fe-Sn/NC | 0.22      | 0.85      |
| Sn/NC    | 0         | 1.19      |

**Table S2** Fe and Sn element content analyzed by EDS

| Sample         | Element | At/% |
|----------------|---------|------|
| Fe-Sn/NC 10-22 | Fe      | 0.02 |
|                | Sn      | 0.06 |
| Fe-Sn/NC 20-22 | Fe      | 0.08 |
|                | Sn      | 0.05 |
| Fe-Sn/NC 15-11 | Fe      | 0.55 |
|                | Sn      | 0.40 |
| Fe-Sn/NC 15-33 | Fe      | 0.74 |
|                | Sn      | 1.20 |

**Table S3** Comparison of CO<sub>2</sub>RR performances between Fe-Sn/NC and other electrocatalysts.

| Catalyst                                           | Electrolyte             | Onset<br>potential (V) | products  | FE  | Stability(h) | Ref.      |
|----------------------------------------------------|-------------------------|------------------------|-----------|-----|--------------|-----------|
| Fe-Sn/NC                                           | 0.5 M KHCO <sub>3</sub> | -0.47                  | CO (g)    | 99% | 105h         | This work |
| Fe <sub>1</sub> /PNG                               | 0.5 M KHCO <sub>3</sub> | -0.4                   | CO (g)    | 99% | 50h          | [3]       |
| Fe <sub>2</sub> C/Fe <sub>4</sub> N@DC             | 0.1 M KHCO <sub>3</sub> | -0.7                   | CO (g)    | 97% | 24h          | [4]       |
| Fe-FN-C GDE                                        | 0.5 M KHCO <sub>3</sub> | -0.5                   | CO (g)    | 93% | 10h          | [5]       |
| SnPc/CNT-OH                                        | 1.0 M KHCO <sub>3</sub> | -1.0                   | HCOOH (l) | 89% | 8h           | [6]       |
| Fe <sub>2</sub> -N <sub>6</sub> -C- <i>o</i>       | 0.5 M KHCO <sub>3</sub> | -1.0                   | CO (g)    | 80% | 21h          | [7]       |
| Sn <sub>3</sub> O(OH) <sub>2</sub> C <sub>12</sub> | 0.5 M KHCO <sub>3</sub> | -0.9                   | HCOOH (l) | 96% | 40h          | [8]       |
| FeNi-NSC                                           | 0.5 M KHCO <sub>3</sub> | -0.9                   | CO (g)    | 96% | 12h          | [9]       |
| Vo-CuO (Sn)                                        | 0.5 M KHCO <sub>3</sub> | -0.5                   | CO (g)    | 99% | 180h         | [10]      |
| Fe <sub>2</sub> NPC                                | 0.1 M KHCO <sub>3</sub> | -0.6                   | CO (g)    | 96% | 12h          | [11]      |
| M-TTCOFs (Fe)                                      | 0.5 M KHCO <sub>3</sub> | -0.7                   | CO(g)     | 91% | 40h          | [12]      |

**Table S4** Summary of reported electrochemical catalysts for Zn-CO<sub>2</sub> battery.

| Catalyst                                   | Electrolyte             | Discharge products | Power density (mW cm <sup>-2</sup> ) | Stability(h) | Ref.      |
|--------------------------------------------|-------------------------|--------------------|--------------------------------------|--------------|-----------|
| Fe-Sn/NC                                   | 0.5 M KHCO <sub>3</sub> | CO (g)             | 1.36 mW cm <sup>-2</sup>             | 26 h         | This work |
| Ni-N <sub>4</sub> sites                    | 0.5 M KHCO <sub>3</sub> | CO (g)             | 1.4 mW cm <sup>-2</sup>              | 20 h         | [13]      |
| Ni and Fe single atoms in N-doped graphene | 2.0 M KCl               | CO (g)             | 1.36 mW cm <sup>-2</sup>             | 90 h         | [14]      |
| FeNC NSs-1000                              | 0.5 M KHCO <sub>3</sub> | CO (g)             | 1.05 mW cm <sup>-2</sup>             | 30 h         | [15]      |
| Fe <sub>1</sub> NC/S <sub>1</sub> -1000    | 0.8 M KHCO <sub>3</sub> | CO (g)             | 2.5 mW cm <sup>-2</sup>              | 25 h         | [16]      |
| Cu-N <sub>2</sub> /GN                      | 0.5 M KHCO <sub>3</sub> | CO (g)             | 1.06 mW cm <sup>-2</sup>             | 33 h         | [17]      |
| BiPdC                                      | 0.1 M KHCO <sub>3</sub> | HCOOH (l)          | 0.42 mW cm <sup>-2</sup>             | 45 h         | [18]      |
| Ni-N <sub>3</sub> -NCNFs                   | 0.5 M KHCO <sub>3</sub> | CO (g)             | 1.05 mW cm <sup>-2</sup>             | 46 h         | [19]      |
| Zn/NC NSs                                  | 0.5 M KHCO <sub>3</sub> | CO (g)             | 1.8 mW cm <sup>-2</sup>              | 25 h         | [20]      |
| N-doped Carbon(NCs)                        | 0.8 M KHCO <sub>3</sub> | CO (g)             | 0.51 mW cm <sup>-2</sup>             | 20 h         | [21]      |
| SAs Fe-N <sub>4</sub> @ Porous Carbon      | 1.0 M KHCO <sub>3</sub> | CO (g)             | 0.925 mW cm <sup>-2</sup>            | 50 h         | [22]      |

## References

1. Y. Gao, T. Xiong, Y. Li, Y. Huang, Y. Li and M. J. T. Balogun, *ACS Omega*, 2019, **4**, 16130-16138.
2. T. Xiong, Z. Zhu, Y. He, M. S. Balogun and Y. Huang, *Small Methods*, 2023, **7**, e2201472.
3. Q. Zhang, H. J. Tsai, F. Li, Z. Wei, Q. He, J. Ding, Y. Liu, Z. Y. Lin, X. Yang, Z. Chen, F. Hu, X. Yang, Q. Tang, H. B. Yang, S. F. Hung and Y. Zhai, *Angew. Chem. Int. Ed.*, 2023, **62**, e202311550.
4. J. Su, D. Pan, Y. Dong, Y. Zhang, Y. Tang, J. Sun, L. Zhang, Z. Tian and L. Chen, *Adv. Energy Mater.*, 2023, **13**, 2204391.
5. Y. Chen, G. Li, Y. Zeng, L. Yan, X. Wang, L. Yang, Q. Wu and Z. Hu, *Nano Res.*, 2022, **15**, 7896-7902.
6. Y. Deng, J. Zhao, S. Wang, R. Chen, J. Ding, H.-J. Tsai, W.-J. Zeng, S.-F. Hung, W. Xu, J. Wang, F. Jaouen, X. Li, Y. Huang and B. Liu, *J. Am. Chem. Soc.*, 2023, **145**, 7242-7251.
7. Y. Wang, B. J. Park, V. K. Paidi, R. Huang, Y. Lee, K.-J. Noh, K.-S. Lee and J. W. Han, *ACS Energy Letters*, 2022, **7**, 640-649.
8. T. Wang, J. D. Chen, X. Y. Ren, J. C. Zhang, J. Ding, Y. H. Liu, K. H. Lim, J. H. Wang, X. N. Li, H. B. Yang, Y. Q. Huang, S. Kawi and B. Liu, *Angew. Chem. Int. Ed.*, 2023, **62**, e202211174.
9. K. Huang, R. Li, H. Qi, S. Yang, S. An, C. Lian, Q. Xu, H. Liu and J. Hu, *Acs Catal.*, 2024, **14**, 8889-8898.
10. X. Zhong, S. Liang, T. Yang, G. Zeng, Z. Zhong, H. Deng, L. Zhang and X. Sun, *ACS Nano*, 2022, **16**, 19210-19219.
11. Y. Shi, Y. Ji, J. Long, Y. Liang, Y. Liu, Y. Yu, J. Xiao and B. Zhang, *Nat. Commun.*, 2020, **11**, 3415.
12. X. Zhao, K. Zhao, Y. Liu, Y. Su, S. Chen, H. Yu and X. Quan, *Acs Catal.*, 2022, **12**, 11412-11420.
13. W. Zheng, F. Chen, Q. Zeng, Z. Li, B. Yang, L. Lei, Q. Zhang, F. He, X. Wu and Y. Hou, *Nanomicro Lett.*, 2020, **12**, 108.
14. Z. Zeng, L. Y. Gan, H. Bin Yang, X. Su, J. Gao, W. Liu, H. Matsumoto, J. Gong, J. Zhang, W. Cai, Z. Zhang, Y. Yan, B. Liu and P. Chen, *Nat. Commun.*, 2021, **12**, 4088.
15. D. Lin, T. Wang, Z. Zhao, Y. Liu, H. Song, X. Yang, Z. Li, S. Yao, X. Hu, L. Lei, B. Yang and Y. Hou, *Nano Energy*, 2023, **113**, 108568.
16. T. Wang, X. Sang, W. Zheng, B. Yang, S. Yao, C. Lei, Z. Li, Q. He, J. Lu, L. Lei, L. Dai and Y. Hou, *Adv. Mater.*, 2020, **32**, e2002430.
17. W. Zheng, J. Yang, H. Chen, Y. Hou, Q. Wang, M. Gu, F. He, Y. Xia, Z. Xia, Z. Li, B. Yang, L. Lei, C. Yuan, Q. He, M. Qiu and X. Feng, *Adv. Funct. Mater.*, 2019, **30**, 1907658.
18. S. Gao, S. Chen, Q. Liu, S. Zhang, G. Qi, J. Luo and X. Liu, *ACS Appl. Nano Mater.*, 2022, **5**, 12387-12394.
19. W. Zheng, Y. Wang, L. Shuai, X. Wang, F. He, C. Lei, Z. Li, B. Yang, L. Lei, C. Yuan, M. Qiu, Y. Hou and X. Feng, *Adv. Funct. Mater.*, 2021, **31**, 2008146.
20. J. Chen, Z. Li, X. Wang, X. Sang, S. Zheng, S. Liu, B. Yang, Q. Zhang, L. Lei, L. Dai and Y. Hou, *Angew. Chem. Int. Ed.*, 2022, **61**, e202111683.
21. X. Hao, X. An, A. M. Patil, P. Wang, X. Ma, X. Du, X. Hao, A. Abudula and G. Guan, *ACS Appl. Mater.*, 2021, **13**, 3738-3747.

22. W. Ni, Z. Liu, Y. Zhang, C. Ma, H. Deng, S. Zhang and S. Wang, *Adv. Mater.*, 2021, **33**, e2003238.
